# Supplementary material for: PEGME-bonded SnO2 quantum dots for excellent photocatalytic activity
Source: Royal Society of Chemistry journal article supplement (doi:10.1039/c3ra42774a), 2013-01-01
Supplement: c3ra42774a.pdf [file c3ra42774a.pdf]

## Supporting Information

### PEGME-bonded SnO<sub>2</sub> quantum dots for excellent photocatalytic activity

Shendong Zhuang,<sup>a</sup> Xiaoyong Xu,<sup>\*a</sup> Yaru Pang,<sup>a</sup> Jingguo Hu,<sup>\*a</sup> Chi Yang,<sup>b</sup>

Ling Tong<sup>a</sup> and Yuxue Zhou<sup>a</sup>

<sup>a</sup> School of Physics Science and Technology, Yangzhou University, Yangzhou  
225002, P. R. China.

<sup>b</sup> Department of Chemistry, Tsinghua University, Beijing 100084, P. R. China.

\* Corresponding author, E-mail: xxy@yzu.edu.cn and jghu@yzu.edu.cn;

Fax: 86-0514-87975467; Tel: 86-0514-87975467;

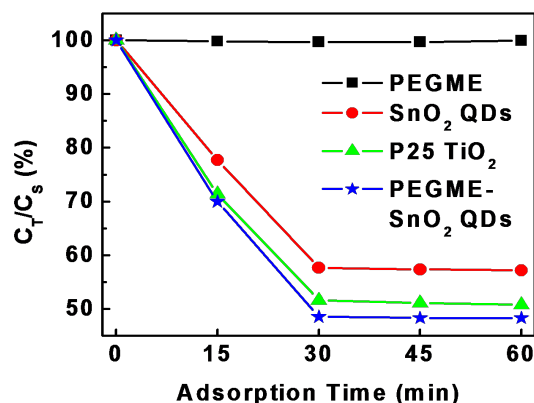

**Fig. S1.** The adsorption-desorption equilibrium curves of the photocatalysts to RhB dye.

Here,  $C_S$  is the concentration of the fresh RhB dye aqueous solution;  $C_T$  is the testing concentration of the RhB dye aqueous solution. Therefore,  $C_T / C_S$  means the degree of adsorption of photocatalysts to RhB dye. When the  $C_T / C_S$  keep unchanged, the adsorption-desorption processes are in equilibrium. It could be clearly found that it could ensure these systems reaching adsorption-desorption equilibrium when the dark adsorption time was set as 1h.

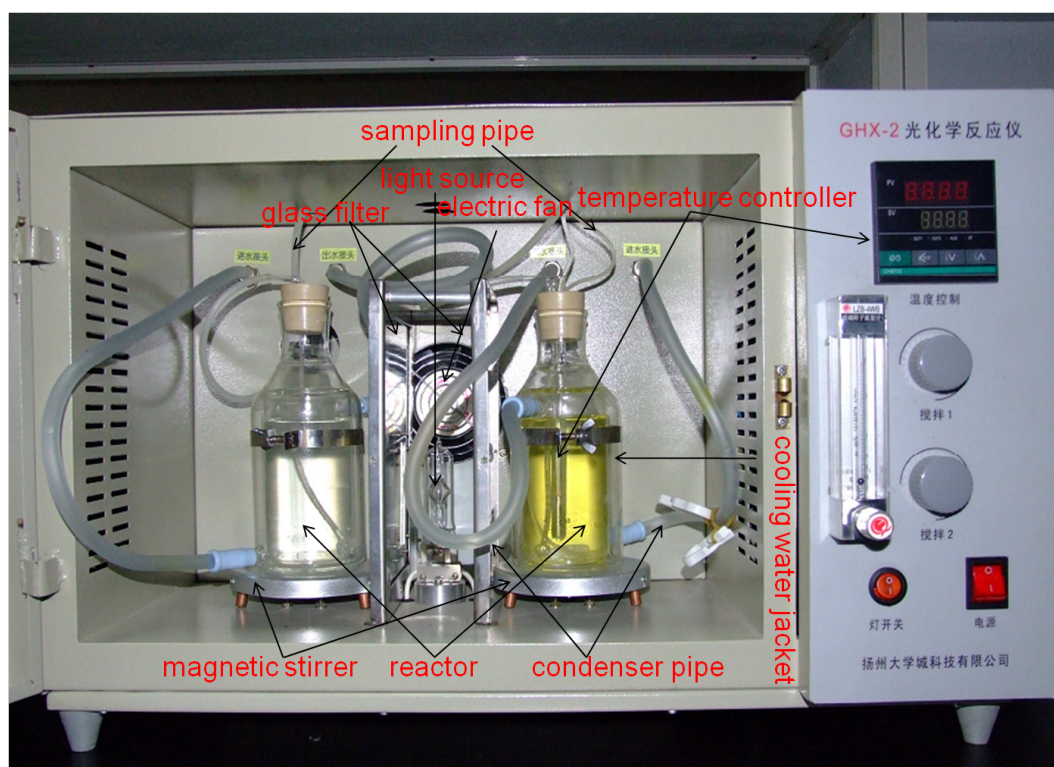

**Fig. S2.** Schematic of the photocatalytic reactor.

The photocatalytic experiments were carried out in a GHX-2 photochemical reactor, which includes mainly four parts: light source system including a 300 W high-pressure mercury lamp, two ( $\lambda > 254$  nm) cutoff filters on both sides and cooling attachments such as electric fan; reactor (two-layer Pyrex glass bottles of 400 mL capacity, the space between the two layers is filled with circulating water to cool the reactor); magnetic stirrer; and temperature controller. In each experiment, the distance between the Xe lamp and the reactor was set to be 5.8 cm, and the reaction temperature was 25 °C. The light intensity in the center position of the reactor was measured to be about  $150 \text{ mWcm}^{-2}$  using an UV-light radiometer (UV-B, Photoelectric Instrument Factory of Beijing Normal University, China) over the wavelength in the range of 230-275 nm.

### Photonic efficiencies of catalysts.

The photonic efficiency  $\xi$ , which is defined as the ratio of the dye degradation rate and the incident photon flux at a given wavelength, is calculated according to Equations (1)-(3) based on the reports of Prof. Yu's, Prof. Mendive's and Prof. Bahnemann's groups.<sup>1-3</sup>

$$\xi = \frac{\text{degradation rate [mol/s]}}{\text{photon flux [mol}h\nu\text{/s]}} = \frac{\Delta C \cdot V}{\Delta t \cdot I_0 \cdot A} \quad (1)$$

$$I_0 = \frac{I \cdot \lambda}{N_A \cdot h \cdot c} \quad (2)$$

$$\text{So, } \xi = \frac{\Delta C \cdot V}{\Delta t} \frac{N_A \cdot h \cdot c}{I \cdot \lambda \cdot A} \quad (3)$$

Where  $\Delta C / \Delta t$  is the degradation rate,  $V$  the volume of the employed test solution,  $I_0$  the photon flux,  $A$  the illuminated area (11.05 cm<sup>2</sup>),  $I$  the light intensity (150 mWcm<sup>-2</sup>),  $\lambda$  the incident wavelength (254 nm),  $N_A$  Avogadro's constant,  $h$  Planck's constant and  $c$  the velocity of light.

Hence, for the reusability of the PEGME-SnO<sub>2</sub> QDs catalyst as shown in Fig. 4 (c), the photonic efficiencies  $\xi$  is 0.0058 %, 0.0057 %, 0.0057 % and 0.0057 % for the four cycles, respectively. And for Fig. 5(a),  $\xi$  is 0.0046 %, 0.0046 %, 0.0046 %, 0.0058 %, 0.0047 %, 0.0033 % and 0.0029 % for different dosages of PEGME-SnO<sub>2</sub> QDs catalysts, 25, 30, 40, 50, 60, 70 and 100 mg, respectively.

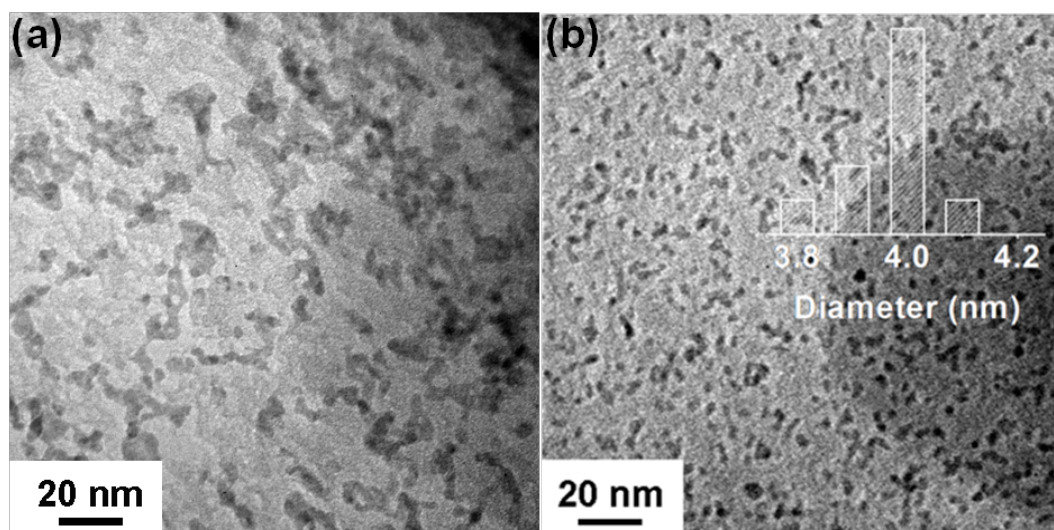

**Fig. S3.** TEM images of the (a) SnO<sub>2</sub> QDs and (b) PEGME-SnO<sub>2</sub> QDs, the inset is the diameter distribution of the PEGME-SnO<sub>2</sub> QDs.

The TEM images of SnO<sub>2</sub> QDs, PEGME-SnO<sub>2</sub> QDs and the diameter distribution (the inset in (b)) are shown in Fig. S3. It can be found that pure SnO<sub>2</sub> QDs are prone to aggregate as shown in Fig. S3(a). However, after the surface-modification of PEGME, SnO<sub>2</sub> QDs could well dispersed as displayed in Fig. S3 (b). So the PEGME-modification could has an apparent effect on the separation of SnO<sub>2</sub> QDs. Moreover, Fig. S3 (b) could support the formation of almost uniform and monodispersed SnO<sub>2</sub> QDs. It can be seen from the inset of Fig. S3 (b) that PEGME-SnO<sub>2</sub> QDs are in narrow size distribution with diameters around 4 nm, which is similar to the average size calculated from the XRD.

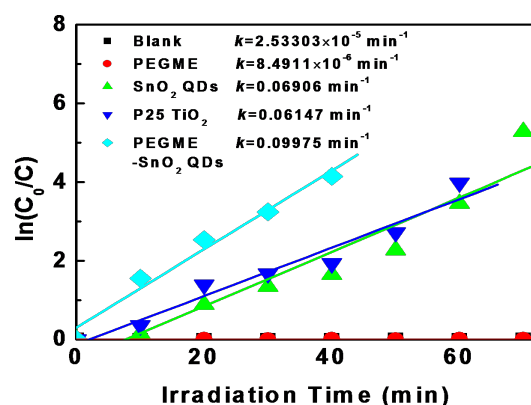

**Fig. S4.** The apparent reaction rate constants ( $k$ ) of the RhB photodegradation on different photocatalysts.

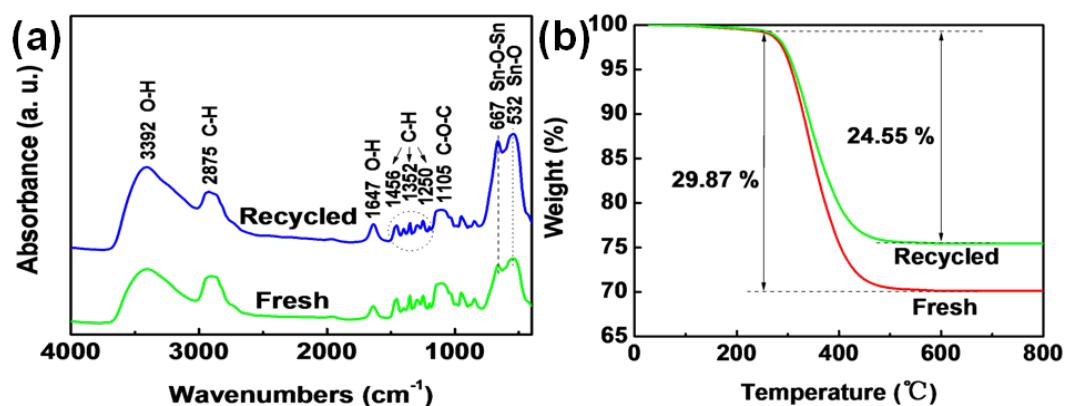

**Fig. S5.** (a) FT-IR and (b) TGA for fresh and recycled PEGME-SnO<sub>2</sub> QDs catalyst.

Compared with the FT-IR of fresh and recycled PEGME-SnO<sub>2</sub> QDs catalysts in Fig. S5(a), the existence of Sn-O-Sn (667 cm<sup>-1</sup>), C-O-C (1105 cm<sup>-1</sup>), C-H (2875 cm<sup>-1</sup>, 1456 cm<sup>-1</sup>, 1352 cm<sup>-1</sup>, and 1250 cm<sup>-1</sup>) and O-H (3392 cm<sup>-1</sup> and 1647 cm<sup>-1</sup>) vibration bonds,<sup>4-6</sup> as well as the almost unchanged Sn-O vibration at around 532 cm<sup>-1</sup> from the SnO<sub>2</sub> surface,<sup>7</sup> indicating that photocatalytic process has not destroyed the composite of PEGME molecules and SnO<sub>2</sub>. This could qualitatively support the stability of PEGME layer on the surface of PEGME-SnO<sub>2</sub> QDs. It could be found from Fig. S5 (b) that, after 4 cycles of photocatalytic process, the mass ratio of PEGME in

PEGME-SnO<sub>2</sub> QDs decreases from 29.87% to 24.55%. The less mass loss (only around 5%) could quantitatively prove the stability of PEGME on the surface of the catalyst. Therefore, the stable recyclability of PEGME-SnO<sub>2</sub> QDs photocatalysts could be supported by the stability of PEGME surface modifiers.

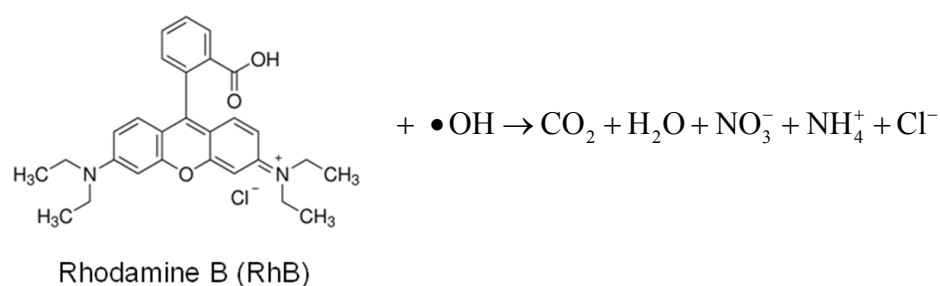

**Fig. S6.** The molecular structural formula and possible degradation mechanism of RhB.<sup>8</sup>

## References

- 1 X. M. Zhou, J. Y. Lan, G. Liu, K. Deng, Y. L. Yang, G. J. Nie, J. G. Yu and L. J. Zhi, *Angew. Chem. Int. Ed.* 2012, **51**, 178-182.
- 2 I. Ivanova, J. Schneider, H. Gutzmann, J. O. Kliemann, F. Gärtner, T. Klassen, D. Bahnemann and C. B. Mendive, *Catal. Today* 2013, **209**, 84-90.
- 3 R. Fateh, R. Dillert and D. Bahnemann, *Langmuir* 2013, **29**, 3730-3739.
- 4 H. M. Xiong, W. Z. Shen, Z. D. Wang, X. Zhang and Y. Y. Xia, *Chem. Mater.*, 2006, **18**, 3850-3854.
- 5 H. M. Xiong, W. Z. Shen, B. K. Guo, S. H. Bo, W. J. Cui, L. Q. Chen, H. Li and Y. Y. Xia, *J. Mater. Chem.*, 2011, **21**, 2845-2847.

- 6 X. Y. Xu, C. X. Xu, Y. Lin, T. Ding, S. J. Fang, Z. L. Shi, W. W. Xia and J. G. Hu, *Appl. Phys. Lett.*, 2012, **100**, 172401.
- 7 Y. Kobayashi, M. Okamoto and A. Tomita, *J. Mater. Sci.*, 1996, **31**, 6125-6127.
- 8 L. X. Hu, F. Yang, W. C. Lu, Y. Hao and H. Yuan, *Appl. Catal. B: Environ.*, 2013, **134-135**, 7-18.
